# Supplementary material for: Hepatitis B virus polymerase-specific T cell epitopes shift in a mouse model of chronic infection
Source: Springer Nature journal article supplement (doi:10.1186/s12985-021-01712-y), 2021-12-01
Supplement: MOESM2 [file 19938512]

**Additional Information Table 2. Peptide matrices**

The table shows which peptides were present in the different peptide pools that were tested to identify those that elicited T cell responses in vaccinated mice.

| Polymerase |    |    |     |    |    |    |    |    |
|------------|----|----|-----|----|----|----|----|----|
| Pools      | A  | B  | C   | D  | E  | F  | G  | H  |
| I          | 1  | 2  | 3   | 4  | 5  | 6  | 7  | 8  |
| J          | 9  | 10 | 11  | 12 | 13 | 14 | 15 | 16 |
| K          | 17 | 18 | 19  | 20 | 21 | 22 | 23 | 24 |
| L          | 25 | 26 | 27  | 28 | 29 | 30 | 31 | 32 |
| M          | 33 | 34 | 35  | 36 | 37 | 38 | 39 | 40 |
| N          | 41 | 42 | 43  | 44 | 45 | 46 | 47 | 48 |
| O          | 49 | 50 | 51  | 52 | 53 | 54 | 55 | 56 |
| P          | 57 | 58 | 59* |    |    |    |    |    |

| Core  |    |    |    |    |    |    |
|-------|----|----|----|----|----|----|
| Pools | A  | B  | C  | D  | E  | F  |
| G     | 1  | 2  | 3  | 4  | 5  | 6  |
| H     | 7  | 8  | 9  | 10 | 11 | 12 |
| I     | 13 | 14 | 15 | 16 | 17 | 18 |
| J     | 19 | 20 | 21 | 22 | 23 | 24 |
| K     | 25 | 26 | 27 | 28 | 29 | 30 |
| L     | 31 | 32 | 33 | 34 | 35 |    |
