# Supplementary material for: Hepatitis B virus polymerase-specific T cell epitopes shift in a mouse model of chronic infection
Source: Springer Nature journal article supplement (doi:10.1186/s12985-021-01712-y), 2021-12-01
Supplement: MOESM3 [file 19938512]

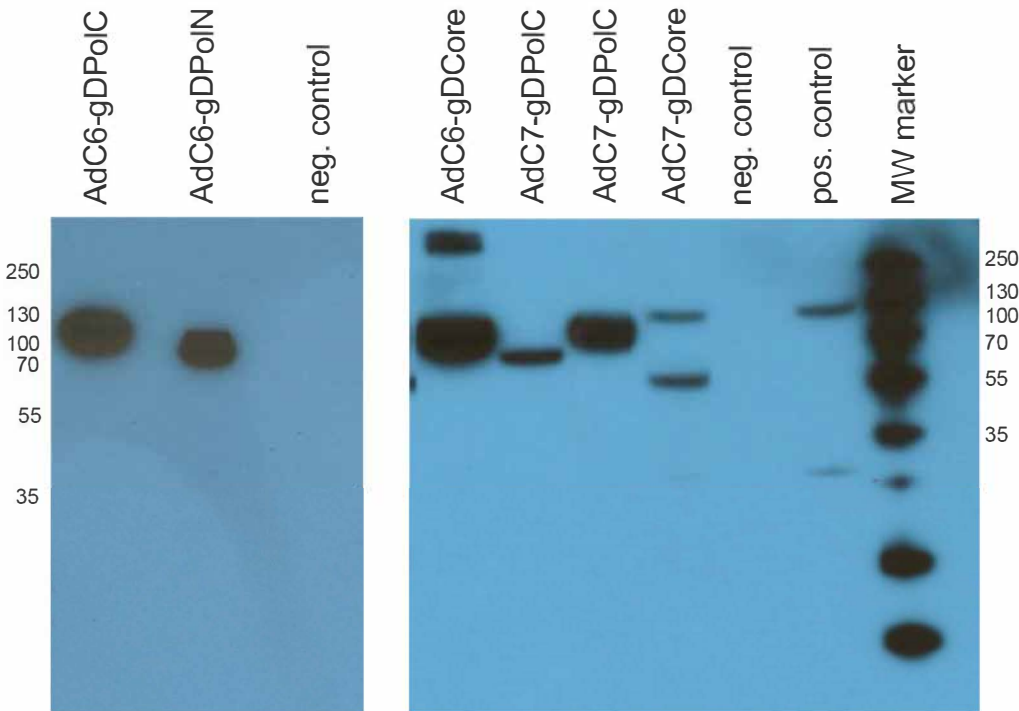

### Expression of the gD fusion proteins by the vaccines.

The figures show results of Western blot for CHO-CAR cells infected with  $10^3$ vp/cells of the AdC6-gDPolC and AdC6-gDPolN vector or HEK293 cells infected with the same doses of the AdC6-gDCore, AdC7-gDPolC, AdC7-gDPolN or AdC7-gDCore vectors. An AdC vector expressing gp140 of HIV-1 was used as a negative control. An AdC vector expressing a gD-HBV oncoprotein fusion protein was used as a positive control. The blots were probed with an antibody to gD, stripped, and then tested with an antibody to  $\beta$ -actin as a loading control (not shown).
